# Supplementary material for: Beaded manganese oxide (Mn2O3) nanofibers: preparation and application for capacitive energy storage
Source: Royal Society of Chemistry journal article supplement (doi:10.1039/c6ta01948j), 2016-01-01
Supplement: c6ta01948j1.pdf [file c6ta01948j1.pdf]

*Supporting Information*

**Beaded Manganese Oxide (Mn<sub>2</sub>O<sub>3</sub>) Nanofibers: Preparation and  
Application for Capacitive Energy Storage**

**Muhamed Shareef Kolathodi<sup>1,3\*</sup>, Samrender Nagam Hanumantha Rao<sup>1,2</sup>, Tirupattur**

**Srinivasan Natarajan<sup>1</sup>, Gurpreet Singh<sup>3</sup>**

*<sup>1</sup>Conducting Polymer Lab, Department of Physics, Indian Institute of Technology Madras,*

*Chennai - 600036, India Fax: +91- 44 22574852; Tel: +91- 4422574860;*

*\*Email: [muhamed@ksu.edu](mailto:muhamed@ksu.edu)*

*<sup>2</sup>Department of Biomedical Engineering, Michigan Technological University, Houghton, MI*

*49931, USA*

*<sup>3</sup>Department of Mechanical and Nuclear Engineering, Kansas State University, Manhattan,*

*Kansas 66506, United States Tel.: +1-785-532-7085; Fax: +1-785-532-7057.*

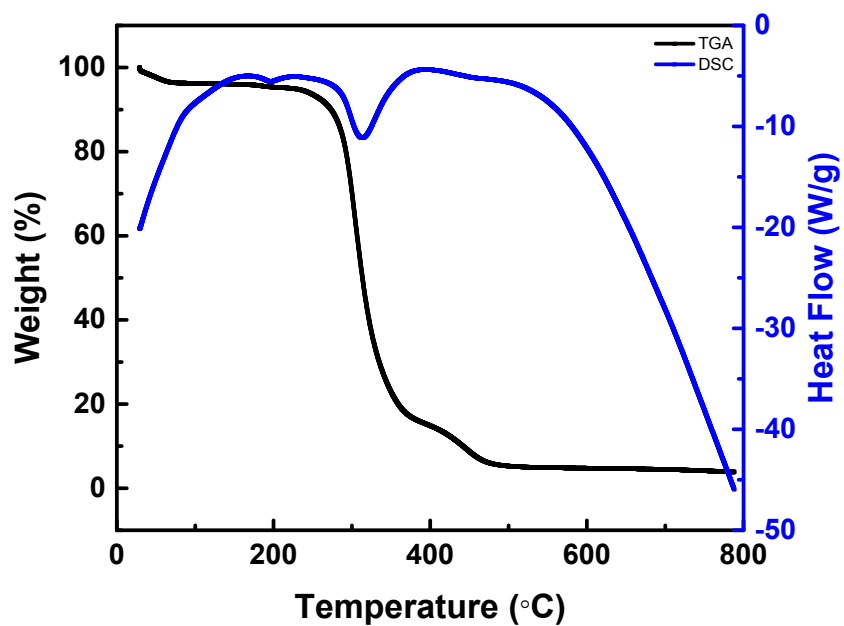

Fig. S1. TGA and DSC plots of as-spun PVA nanofibers.

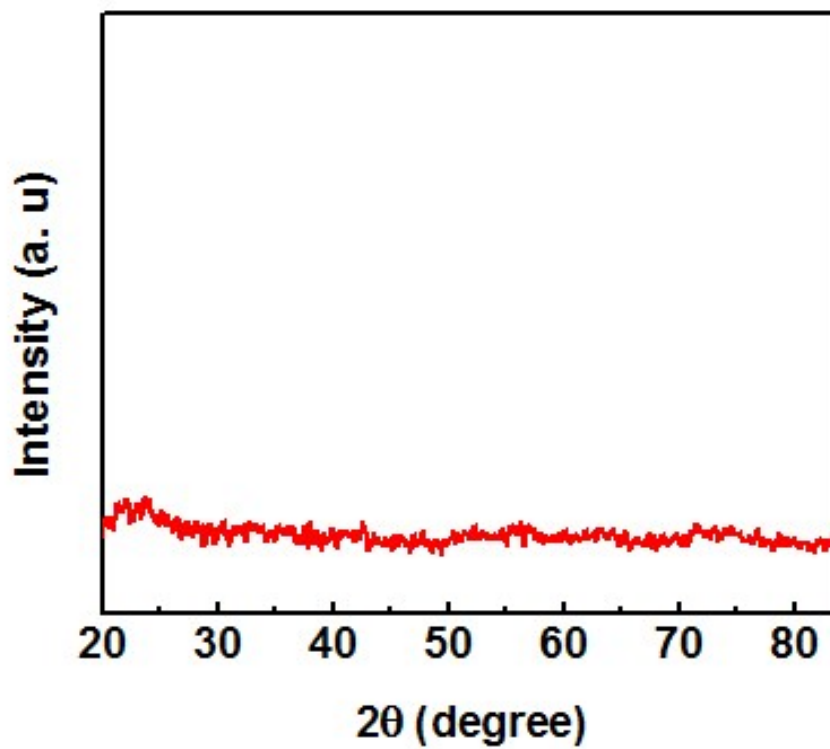

Fig. S2. Powder XRD pattern of as-spun MnAc-PVA nanofibers

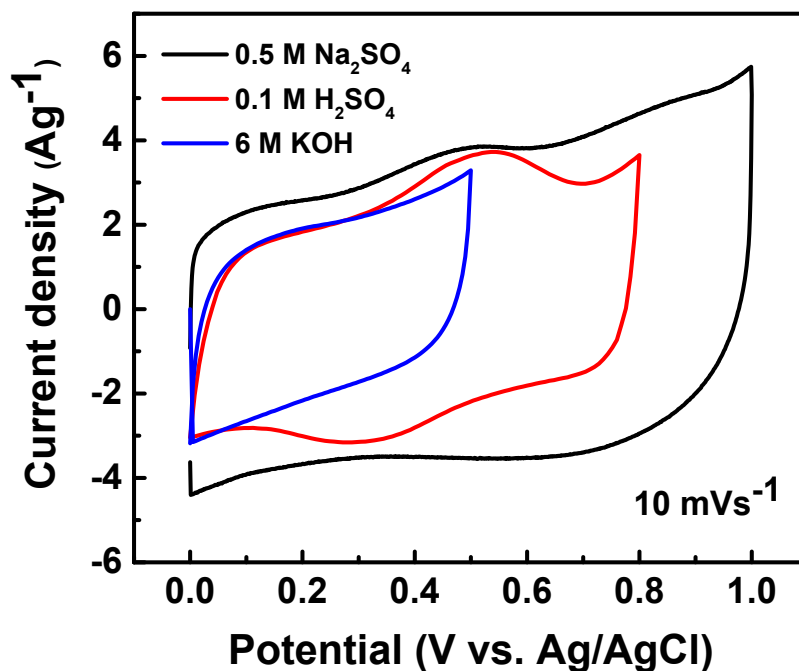

**Fig. S3.** Cyclic voltammograms recorded at a scan rate of  $10 \text{ mVs}^{-1}$ , for  $\text{Mn}_2\text{O}_3$  nanobead fiber electrodes in different electrolytes.

**Table S1.** Comparison of electrochemical properties of the  $\text{Mn}_2\text{O}_3$  Nanofibers with other  $\text{MnO}_x$  based composite structures.

| Electrode material                                                      | Electrolyte                 | Potential window (V) | Specific capacitance ( $\text{Fg}^{-1}$ ) | Current Density         | Reference |
|-------------------------------------------------------------------------|-----------------------------|----------------------|-------------------------------------------|-------------------------|-----------|
| Carboxylated-graphene- $\text{Mn}_2\text{O}_3$ (G-COOMn) nanocomposites | 1M $\text{Na}_2\text{SO}_4$ | 0.7                  | $\sim 300$                                | $50 \text{ mA cm}^{-2}$ | 1         |
| Hybrid $\text{MnO}_x$ films with additions of                           | 1M $\text{Na}_2\text{SO}_4$ | 0.9                  | 340.3                                     | $25 \text{ mVs}^{-1}$   | 2         |

multiwalled  
carbon nanotubes

|                                                                                                                                               |                                         |                                       |        |                       |                 |
|-----------------------------------------------------------------------------------------------------------------------------------------------|-----------------------------------------|---------------------------------------|--------|-----------------------|-----------------|
| Porous Mn <sub>2</sub> O <sub>3</sub><br>nanocubics                                                                                           | 0.5M Na <sub>2</sub> SO <sub>4</sub>    | 0.8                                   | 191.1  | 0.1 Ag <sup>-1</sup>  | 3               |
| MnO <sub>x</sub> /carbon<br>nanofibers<br>composites                                                                                          | 0.5M Na <sub>2</sub> SO <sub>4</sub>    | 1.0                                   | 174.8  |                       | 4               |
| MnO <sub>x</sub> /carbon<br>nanofibers<br>composites                                                                                          | 0.5M Na <sub>2</sub> SO <sub>4</sub>    | 1.0                                   | 211    | 0.25 Ag <sup>-1</sup> | 5               |
| Porous<br>honeycomb<br>manganese<br>oxide@carbon<br>fibers<br>(HMO@CFs)                                                                       | 1M Na <sub>2</sub> SO <sub>4</sub>      | 1.0                                   | 295.24 | 0.1 Ag <sup>-1</sup>  | 6               |
| $\alpha$ -<br>MnO <sub>2</sub> nanowires<br>@Ni <sub>1-x</sub><br>Mn <sub>x</sub> O <sub>y</sub> nanoflak<br>es core-shell<br>nanostructures. | 0.5M<br>Na <sub>2</sub> SO <sub>4</sub> | 0.8                                   | 657    | 0.25 Ag <sup>-1</sup> | 7               |
| K <sub>0.26</sub> MnO <sub>2</sub><br>nanoflake<br>assemblies                                                                                 | 2M KCl                                  | 2.0<br>(Asymmetric<br>Supercapacitor) | 81.7   | 2.0 Ag <sup>-1</sup>  | 8               |
| Mn <sub>2</sub> O <sub>3</sub><br>Nanofibers                                                                                                  | 0.5M Na <sub>2</sub> SO <sub>4</sub>    | 1.0                                   | 358    | 0.5 Ag <sup>-1</sup>  | Present<br>work |

**References:**

1. K.-W. Park, *Journal of Materials Chemistry A*, 2014, 2, 4292-4298.
2. C. K. Lin, C. H. Wu, C. Y. Tsai, C. Y. Chen and S. C. Wang, *Surface and Coatings Technology*, 2010, 205, 1595-1598.
3. W. Li, J. Shao, Q. Liu, X. Liu, X. Zhou and J. Hu, *Electrochimica Acta*, 2015, 157, 108-114.
4. X. Zhao, Y. Du, Y. Li and Q. Zhang, *Ceramics International*, 2015, 41, 7402-7410.
5. Y. Du, X. Zhao, Z. Huang, Y. Li and Q. Zhang, *RSC Advances*, 2014, 4, 39087-39094.

6. D. Zhang, Y. Zhang, Y. Luo and P. K. Chu, *Nano Energy*, 2015, 13, 47-57.
7. H.-Y. Wang, F.-X. Xiao, L. Yu, B. Liu and X. W. Lou, *Small*, 2014, 10, 3181-3186.
8. Q. Li, X. Sun, K. Lozano and Y. Mao, *RSC Advances*, 2013, 3, 24886-24890.
